# Supplementary material
Source: PubMed Central journal article supplement (PMC5932085)

Supplemental Figure 1

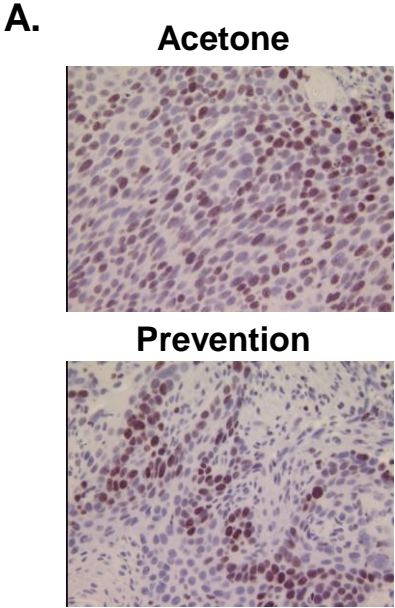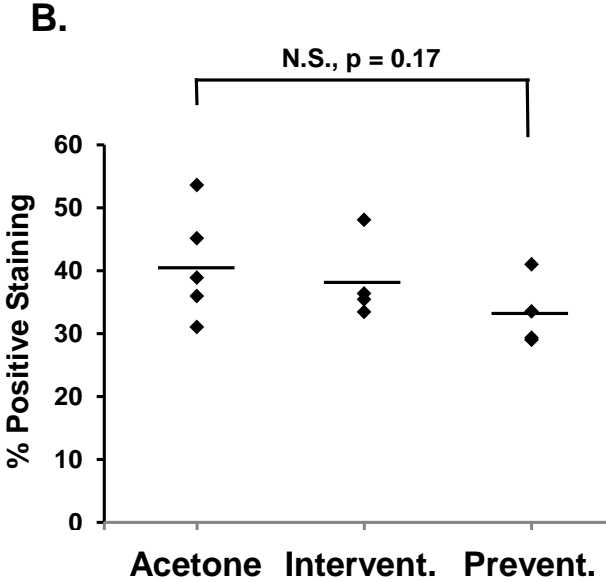

Supplement: NIHMS938015-supplement-1.pdf [file NIHMS938015-supplement-1.pdf]
